# Supplementary material
Source: Research Square preprint supplement (doi:10.21203/rs.3.rs-8905456/v1)
Supplement: Supplementary file 1 [file 137e62d9854a298533ba5741.docx]

**Appendix A**

**Wave I School Climate Measures**

During the 1995-1996 school year, how often did you have trouble:

0 – Never; 1 – Just a few times; 2 – About once a week; 3 – Almost every day; 4 – Every day

- Getting along with your teachers?
- Paying attention in school?
- Getting your homework done?
- Getting along with other students?

How much do you agree or disagree with the following statements?

1 – Strongly Agree; 2 – Agree; 3 – Neither; 4 – Disagree; 5 – Strongly Disagree

- Last year, you felt close to people at your school.
- Last year, you felt like you were part of your school.
- Last year, the students at your school were prejudiced.
- Last year, you were happy to be at your school.
- Last year, the teachers at your school treated students fairly.
- Last year, you felt safe at your school.
